# Supplementary material for: An amplicon-based nanopore sequencing workflow for rapid tracking of avian influenza outbreaks, France, 2020-2022
Source: PubMed Central journal article supplement (PMC10839014; doi:10.3389/fcimb.2024.1257586), 2024-01-22
Supplement: DataSheet_1.pdf [file DataSheet_1.pdf]

Supplementary\_file\_1\_2020-2022 Outbreaks sequencing

| Reference | Sample type   | Sampling date (YYYY-MM-DD) | Host       | French department | RTqPCR CT value (M gene) | Total yield (Mb) | N50 (bp) | HA accession number | HA yield (Mb) | N50 HA (bp) | 10X_HA |
|-----------|---------------|----------------------------|------------|-------------------|--------------------------|------------------|----------|---------------------|---------------|-------------|--------|
| 20323     | Tracheal swab | 2020-12-06                 | Mule_duck  | 40                | 28,5                     | 230,59           | 640      | MZ166252            | 30,53         | 661         | 100,0% |
| 20335     | Tracheal swab | 2020-12-10                 | Mule_duck  | 40                | 24,7                     | 139,52           | 891      | MZ166260            | 6,05          | 636         | 100,0% |
| 20338     | Tracheal swab | 2020-12-13                 | Mule_duck  | 85                | 27,1                     | 96,09            | 572      | MZ166268            | 0,36          | 469         | 100,0% |
| 20339     | Dust          | 2020-12-13                 | Mule_duck  | 79                | 20,4                     | 129,52           | 882      | MZ166276            | 9,10          | 641         | 100,0% |
| 20347     | Tracheal swab | 2020-12-15                 | Mule_duck  | 40                | 14                       | 474,13           | 937      | MZ166239            | 45,34         | 1 818       | 100,0% |
| 20349     | Tracheal swab | 2020-12-21                 | Mule_duck  | 40                | 20,4                     | 2,34             | 896      | MZ166284            | 0,17          | 656         | 100,0% |
| 20352     | Tracheal swab | 2020-12-26                 | Mule_duck  | 40                | 18,9                     | 289,83           | 808      | MZ166292            | 22,99         | 648         | 100,0% |
| 20353     | Feather       | 2020-12-27                 | Mule_duck  | 40                | 23,5                     | 301,95           | 897      | MZ166300            | 28,36         | 598         | 100,0% |
| 21061     | Dust          | 2021-01-28                 | Mule_duck  | 65                | 25                       | 28,62            | 443      | MZ166240            | 1,17          | 681         | 100,0% |
| 21064     | Tracheal swab | 2021-01-30                 | Mule_duck  | 65                | 20                       | 28,35            | 872      | MZ166308            | 7,65          | 652         | 100,0% |
| 21084     | Tracheal swab | 2021-02-20                 | Mule_duck  | 32                | 22,8                     | 366,39           | 888      | MZ166316            | 32,68         | 673         | 100,0% |
| 21328     | Dust          | 2021-11-28                 | Chicken    | 59                | 26,23                    | 88,81            | 913      | OQ632895            | 81,2          | 915         | 100,0% |
| 21343     | Feather       | 2021-12-16                 | Mule_duck  | 32                | 16,02                    | 65,13            | 881      | OQ632818            | 30,24         | 654         | 100,0% |
| 21347     | Feather       | 2021-12-18                 | Mule_duck  | 40                | 16,21                    | 153,82           | 713      | OQ632819            | 79,53         | 658         | 100,0% |
| 21348     | Feather       | 2021-12-18                 | Mule_duck  | 64                | 13,03                    | 205,89           | 682      | OQ632820            | 121,51        | 611         | 100,0% |
| 21349     | Feather       | 2021-12-20                 | Mule_duck  | 64                | 13,23                    | 107,84           | 663      | OQ632821            | 62,74         | 615         | 100,0% |
| 21350     | Dust          | 2021-12-23                 | Mule_duck  | 64                | 21,39                    | 76,67            | 905      | OQ632822            | 12,81         | 731         | 100,0% |
| 21351     | Feather       | 2021-12-26                 | Mule_duck  | 40                | 18,14                    | 76,03            | 883      | OQ632823            | 33,46         | 646         | 92,5%  |
| 21352     | Dust          | 2021-12-26                 | Mule_duck  | 40                | 23,79                    | 87,02            | 616      | OQ632824            | 14,78         | 660         | 61,6%  |
| 21356     | Feather       | 2021-12-30                 | Mule_duck  | 40                | 17,56                    | 99,36            | 890      | OQ632825            | 45,56         | 664         | 100,0% |
| 22005     | Tracheal swab | 2022-01-04                 | Pekin_duck | 32                | 17,97                    | 83,93            | 903      | OQ632826            | 33,8          | 667         | 100,0% |
| 22008     | Feather       | 2022-01-09                 | Mule_duck  | 40                | 18,76                    | 86,05            | 765      | OQ632827            | 40,5          | 661         | 100,0% |
| 22010     | Dust          | 2022-01-03                 | Mule_duck  | 64                | 26,24                    | 71,57            | 738      | OQ632828            | 15,66         | 662         | 98,2%  |
| 22027     | Feather       | 2022-01-11                 | Mule_duck  | 32                | 18,34                    | 98,32            | 887      | OQ632829            | 48,77         | 664         | 100,0% |
| 22029     | Feather       | 2022-01-14                 | Mule_duck  | 64                | 17,12                    | 58,08            | 875      | OQ632830            | 29,09         | 648         | 100,0% |
| 22030     | Feather       | 2022-01-14                 | Mule_duck  | 64                | 18,33                    | 70,17            | 721      | OQ632831            | 36,26         | 648         | 100,0% |
| 22036     | Feather       | 2022-01-19                 | Mule_duck  | 32                | 20,27                    | 72,18            | 738      | OQ632832            | 32,74         | 655         | 100,0% |
| 22077     | Cloacal swab  | 2022-02-04                 | Pekin_duck | 40                | 27,71                    | 78,84            | 630      | OQ632833            | 11,39         | 658         | 100,0% |
| 22083     | Tracheal swab | 2022-02-11                 | Mule_duck  | 65                | 24,69                    | 79,12            | 646      | OQ632834            | 6,6           | 656         | 100,0% |
| 22084     | Feather       | 2022-02-11                 | Turkey     | 85                | 21,02                    | 49,45            | 894      | OQ632835            | 18,42         | 652         | 100,0% |
