# Supplementary material for: An amplicon-based nanopore sequencing workflow for rapid tracking of avian influenza outbreaks, France, 2020-2022
Source: PubMed Central journal article supplement (PMC10839014; doi:10.3389/fcimb.2024.1257586), 2024-01-22
Supplement: DataSheet_2.pdf [file DataSheet_2.pdf]

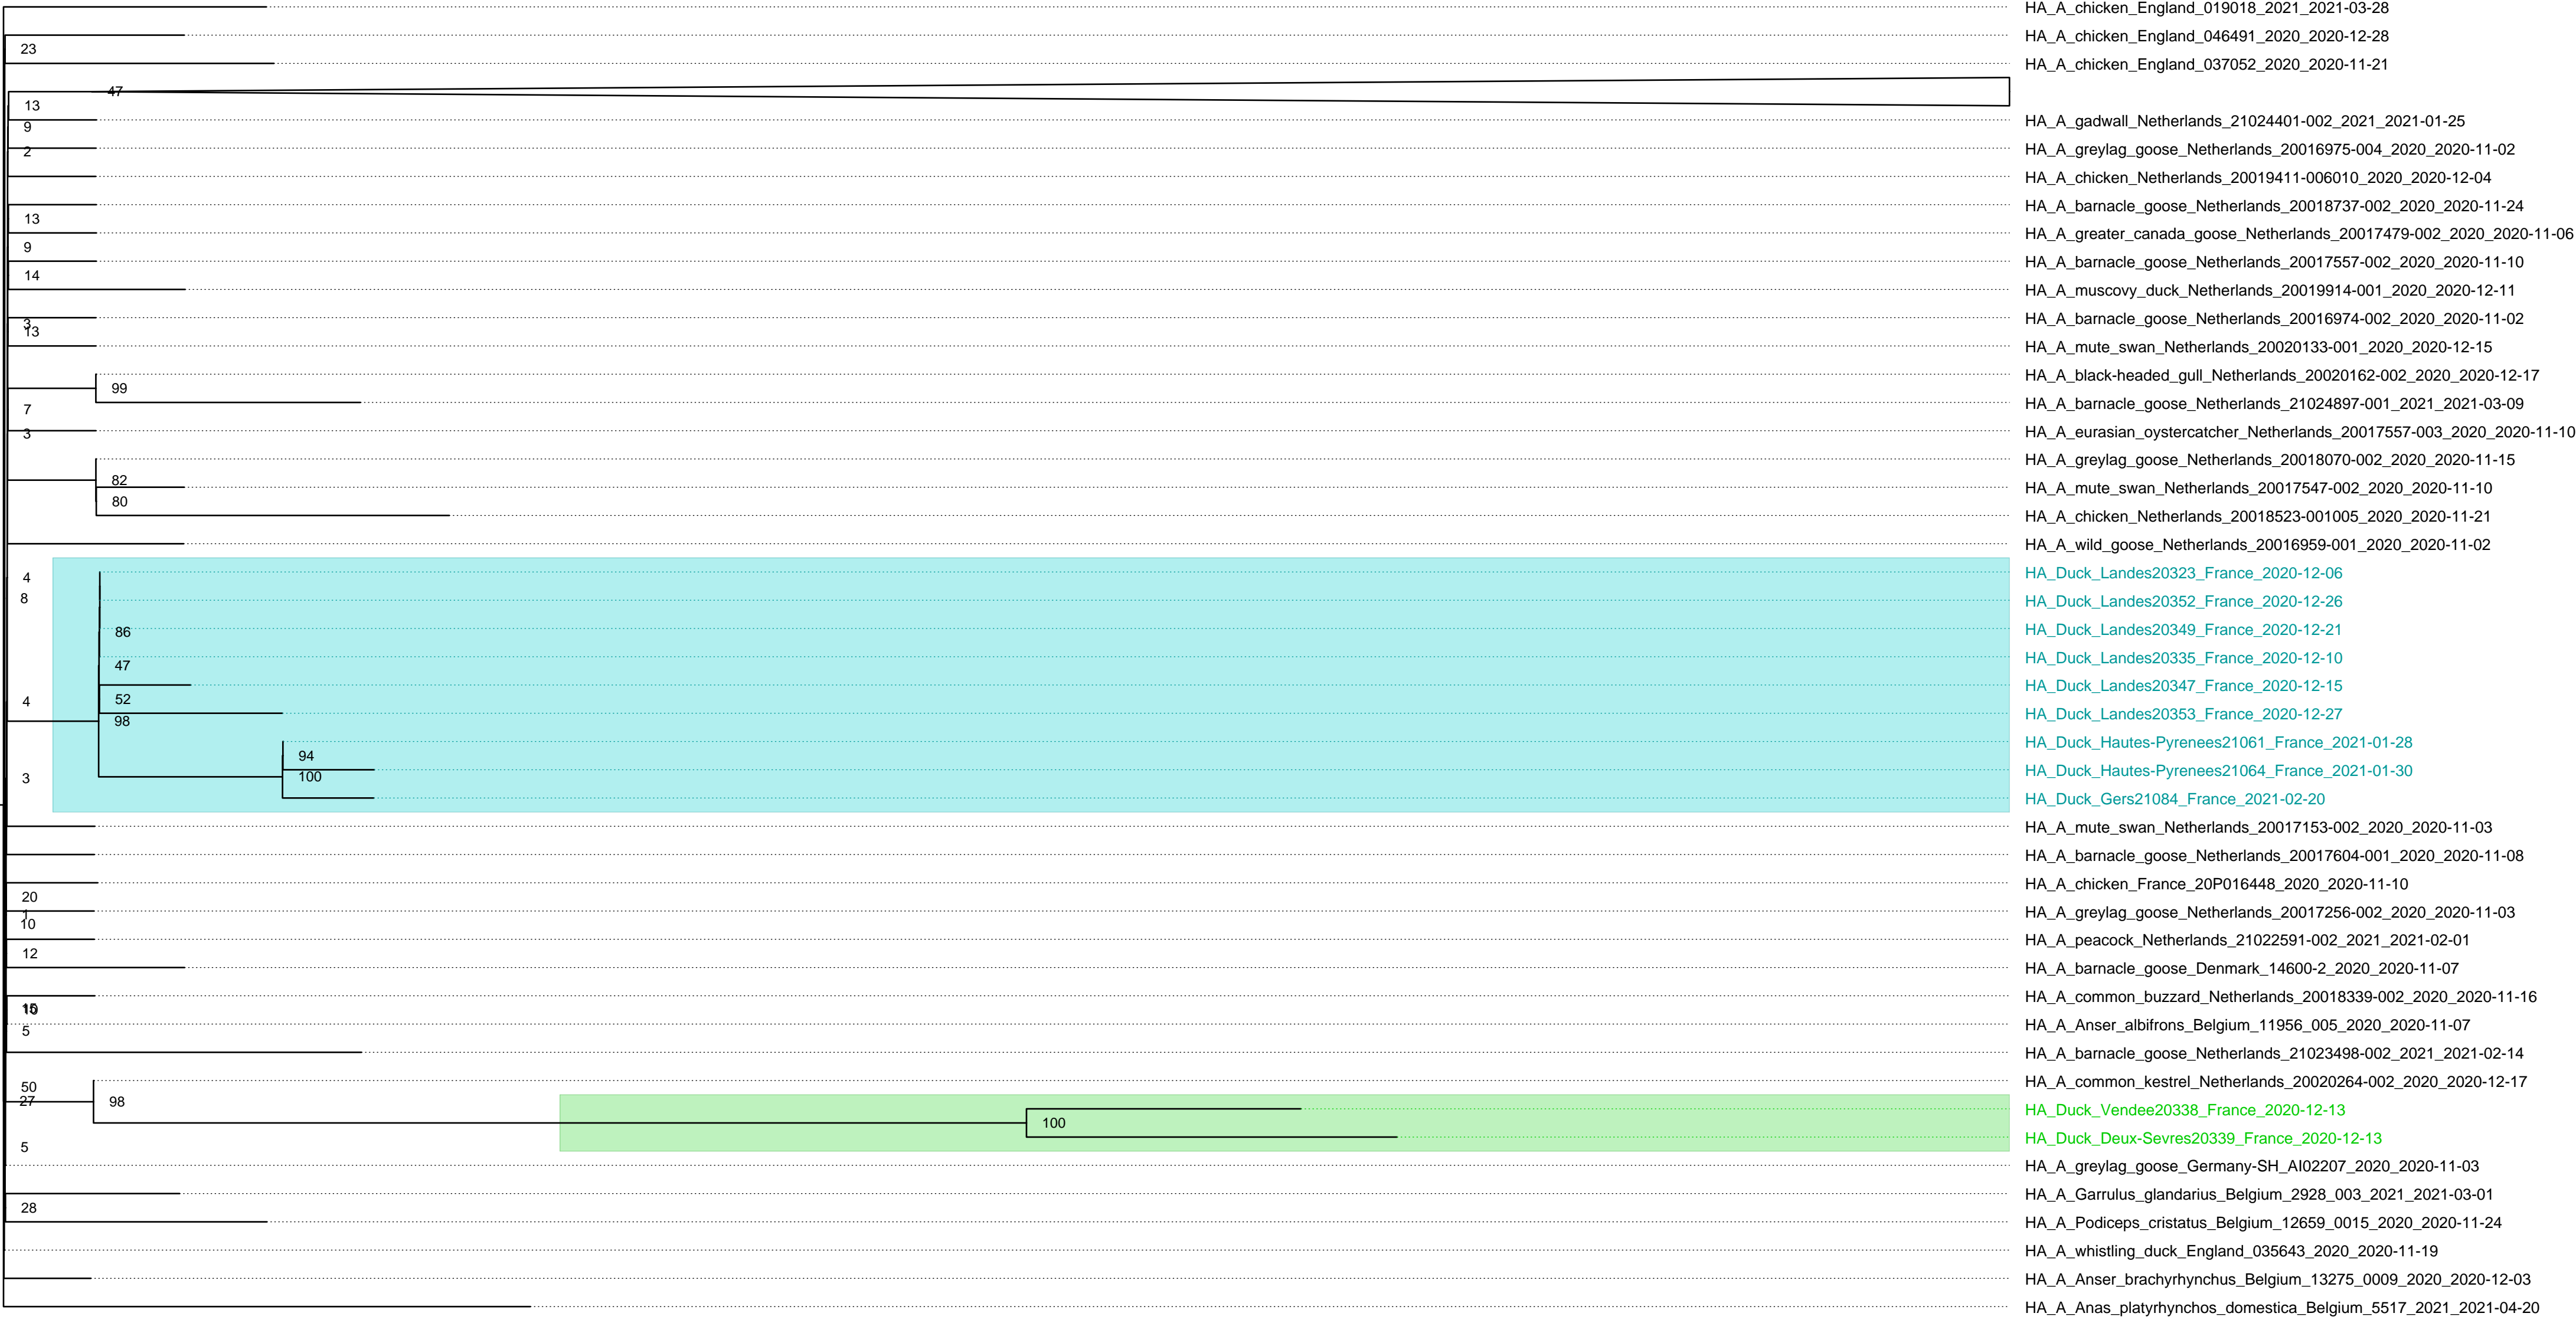

0.002
