# Supplementary material for: An amplicon-based nanopore sequencing workflow for rapid tracking of avian influenza outbreaks, France, 2020-2022
Source: PubMed Central journal article supplement (PMC10839014; doi:10.3389/fcimb.2024.1257586), 2024-01-22
Supplement: DataSheet_3.pdf [file DataSheet_3.pdf]

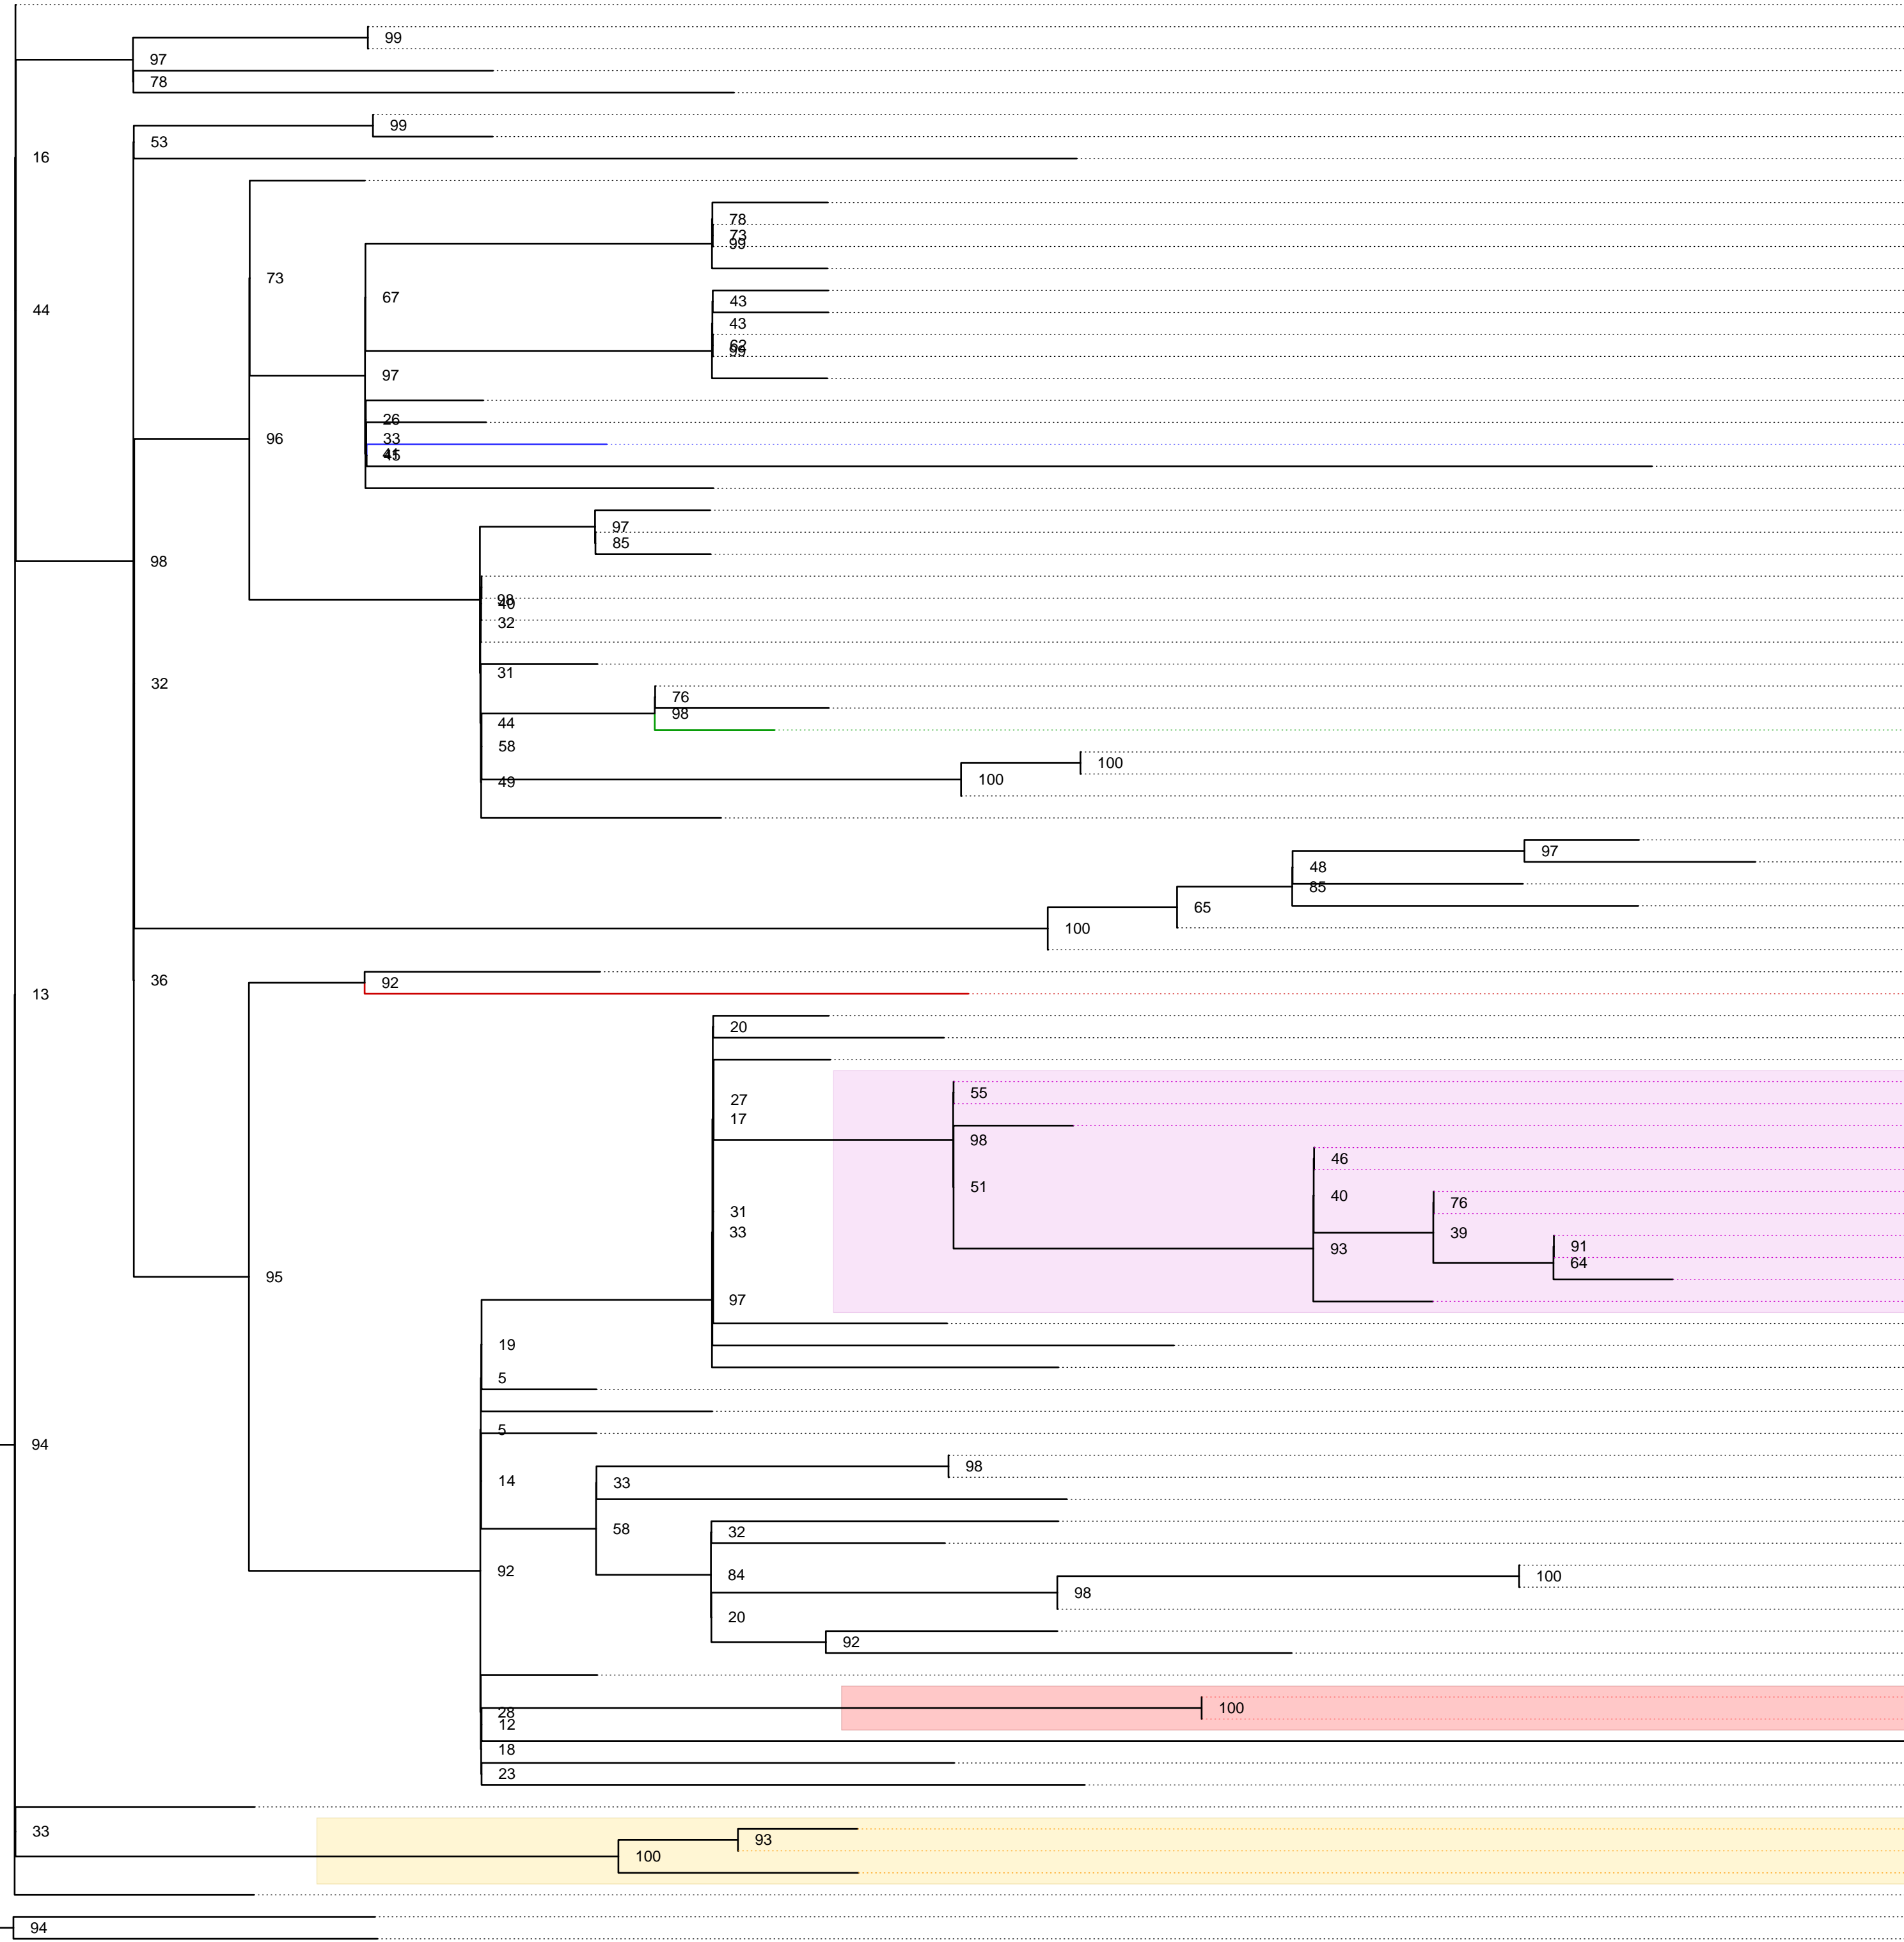

HA\_A\_chicken\_Italy\_21VIR9951-25\_2021\_2021-11-22  
 HA\_A\_turkey\_Italy\_21VIR9816-1\_2021\_2021-11-19  
 HA\_A\_chicken\_Italy\_21VIR9133-21\_2021\_2021-11-04  
 HA\_A\_chicken\_Czech\_Republic\_913\_2022\_2022-01-12  
 HA\_A\_duck\_Czech\_Republic\_913\_2022\_2022-01-12  
 HA\_A\_duck\_Italy\_22VIR1295-1\_2022\_2022-02-08  
 HA\_A\_chicken\_Italy\_IZSLT22VIR2562-1\_2022\_2022-03-15  
 HA\_A\_duck\_Italy\_21VIR10447\_2021\_2021-12-01  
 HA\_A\_chicken\_Italy\_21VIR11238\_2021\_2021-12-14  
 HA\_A\_turkey\_Netherlands\_21040980-001005\_2021\_2021-12-20  
 HA\_A\_chicken\_England\_062137\_2021\_2021-11-25  
 HA\_A\_Common\_eider\_England\_023549\_2022\_2022-03-03  
 HA\_A\_chicken\_Scotland\_029509\_2022\_2022-03-18  
 HA\_A\_chicken\_Scotland\_024309\_2022\_2022-03-09  
 HA\_A\_domestic\_duck\_Scotland\_024305\_2022\_2022-03-09  
 HA\_A\_chicken\_England\_034820\_2022\_2022-03-28  
 HA\_A\_domestic\_duck\_England\_025639\_2022\_2022-03-11  
 HA\_A\_domestic\_duck\_England\_032919\_2022\_2022-03-26  
 HA\_A\_domestic\_duck\_England\_019894\_2022\_2022-02-28  
 HA\_A\_domestic\_duck\_England\_012247\_2022\_2022-02-03  
 HA\_A\_chicken\_Netherlands\_22001401-001005\_2022\_2022-01-22  
 HA\_A\_chicken\_Spain\_452-17\_22VIR2142-22\_2022\_2022-02-07  
 HA\_Duck\_Vendee22084\_France\_2022-02-11  
 HA\_A\_Gallus\_gallus\_Belgium\_4190\_0002\_2022\_2022-03-28  
 HA\_A\_chicken\_England\_014330\_2022\_2022-02-12  
 HA\_A\_chicken\_England\_002376\_2022\_2022-01-08  
 HA\_A\_domestic\_duck\_England\_076401\_2021\_2021-12-30  
 HA\_A\_turkey\_England\_076717\_2021\_2021-12-30  
 HA\_A\_turkey\_England\_000733\_2022\_2022-01-04  
 HA\_A\_domestic\_duck\_England\_000357\_2022\_2022-01-02  
 HA\_A\_chicken\_England\_000095\_2022\_2022-01-02  
 HA\_A\_chicken\_England\_070277\_2021\_2021-12-13  
 HA\_A\_duck\_Netherlands\_21037958-001005\_2021\_2021-11-03  
 HA\_A\_chicken\_France\_21P013076\_2021\_2021-11-25  
 HA\_A\_Gallus\_gallus\_Belgium\_15977\_2021\_2021-12-06  
 HA\_Dust\_Nord21328\_France\_2021-11-28  
 HA\_A\_chicken\_Spain\_806-7\_22VIR6312-41\_2022\_2022-02-26  
 HA\_A\_chicken\_Spain\_1096-8\_22VIR6312-35\_2022\_2022-03-16  
 HA\_A\_chicken\_Spain\_340-37\_22VIR6312-37\_2022\_2022-01-31  
 HA\_A\_turkey\_Lisbon\_1\_2021\_2021-12-05  
 HA\_A\_domestic\_duck\_England\_070195\_2021\_2021-12-12  
 HA\_A\_Chicken\_Sweden\_SVA211130SZ0427\_FB290424-IP-1\_M-2021\_2021-11-30  
 HA\_A\_chicken\_Scotland\_068270\_2021\_2021-12-09  
 HA\_A\_Muscovy\_duck\_England\_074477\_2021\_2021-12-21  
 HA\_A\_domestic\_duck\_Germany-BB\_AI06239\_2021\_2021-11-02  
 HA\_A\_chicken\_Germany-BB\_AI06242\_2021\_2021-11-02  
 HA\_A\_mallard\_Netherlands\_21038796-002\_2021\_2021-11-13  
 HA\_Duck\_Gers21343\_France\_2021-12-16  
 HA\_A\_mallard\_duck\_England\_388009\_2022\_2022-01-27  
 HA\_A\_chicken\_England\_072926\_2021\_2021-12-17  
 HA\_A\_gadwall\_Netherlands\_22000307-001\_2022\_2022-01-04  
 HA\_Duck\_Landes21347\_France\_2021-12-18  
 HA\_Duck\_Pyrenees-Atlantiques21349\_France\_2021-12-20  
 HA\_Duck\_Pyrenees-Atlantiques21348\_France\_2021-12-18  
 HA\_Dust\_Pyrenees-Atlantiques21350\_France\_2021-12-23  
 HA\_Dust\_Landes21352\_France\_2021-12-26  
 HA\_Duck\_Landes21351\_France\_2021-12-26  
 HA\_Duck\_Gers22036\_France\_2022-01-19  
 HA\_Duck\_Gers22005\_France\_2022-01-04  
 HA\_Duck\_Gers22027\_France\_2022-01-11  
 HA\_Duck\_Landes22008\_France\_2022-01-09  
 HA\_Duck\_Landes21356\_France\_2021-12-30  
 HA\_A\_chicken\_Netherlands\_21039901-001-005\_2021\_2021-12-01  
 HA\_A\_Gallus\_gallus\_Belgium\_17100\_0001\_2021\_2021-12-27  
 HA\_A\_chicken\_England\_009811\_2022\_2022-01-27  
 HA\_A\_turkey\_England\_068583\_2021\_2021-12-09  
 HA\_A\_Turkey\_Sweden\_SVA211212SZ0001\_FB301013-IP-2\_M-2021\_2021-12-12  
 HA\_A\_turkey\_England\_055251\_2021\_2021-11-06  
 HA\_A\_chicken\_Czech\_Republic\_23404\_2021\_2021-11-25  
 HA\_A\_chicken\_Czech\_Republic\_23404-4T\_2021\_2021-11-25  
 HA\_A\_duck\_Czech\_Republic\_3306-1\_2022\_2022-02-09  
 HA\_A\_chicken\_England\_008775\_2022\_2022-01-26  
 HA\_A\_chicken\_Denmark\_24357-11\_2021-11-02\_2021-11-02  
 HA\_A\_chicken\_England\_007584\_2022\_2022-01-23  
 HA\_A\_turkey\_England\_007586\_2022\_2022-01-23  
 HA\_A\_domestic\_duck\_England\_069098\_2021\_2021-12-10  
 HA\_A\_chicken\_Northern\_Ireland\_17903\_2021\_2021-12-10  
 HA\_A\_turkey\_England\_009687\_2022\_2022-01-27  
 HA\_A\_chicken\_Netherlands\_21038165-006010\_2021\_2021-11-07  
 HA\_Duck\_Landes22077\_France\_2022-02-04  
 HA\_Duck\_Hautes-Pyrenees22083\_France\_2022-02-11  
 HA\_A\_chicken\_Czech\_Republic\_2968\_2022\_2022-02-04  
 HA\_A\_chicken\_Czech\_Republic\_63\_2022\_2022-01-03  
 HA\_A\_turkey\_Italy\_IZSLT\_22VIR366-3\_2022\_2022-01-04  
 HA\_A\_chicken\_Italy\_22VIR1953-4\_2022\_2022-02-22  
 HA\_Dust\_Pyrenees-Atlantiques22010\_France\_2022-01-03  
 HA\_Duck\_Pyrenees-Atlantiques22029\_France\_2022-01-14  
 HA\_Duck\_Pyrenees-Atlantiques22030\_France\_2022-01-14  
 HA\_A\_turkey\_Italy\_21VIR9210-1\_2021\_2021-11-05  
 HA\_A\_chicken\_Italy\_21VIR10386\_2021\_2021-11-30  
 HA\_A\_chicken\_Italy\_22VIR234-1\_2022\_2022-01-08

0.002
